# Supplementary material for: MetAP2 inhibition reduces food intake and body weight in a ciliopathy mouse model of obesity
Source: JCI journal article supplement (doi:10.1172/jci.insight.134278), 2019-12-26
Supplement: sd1 [file 1]

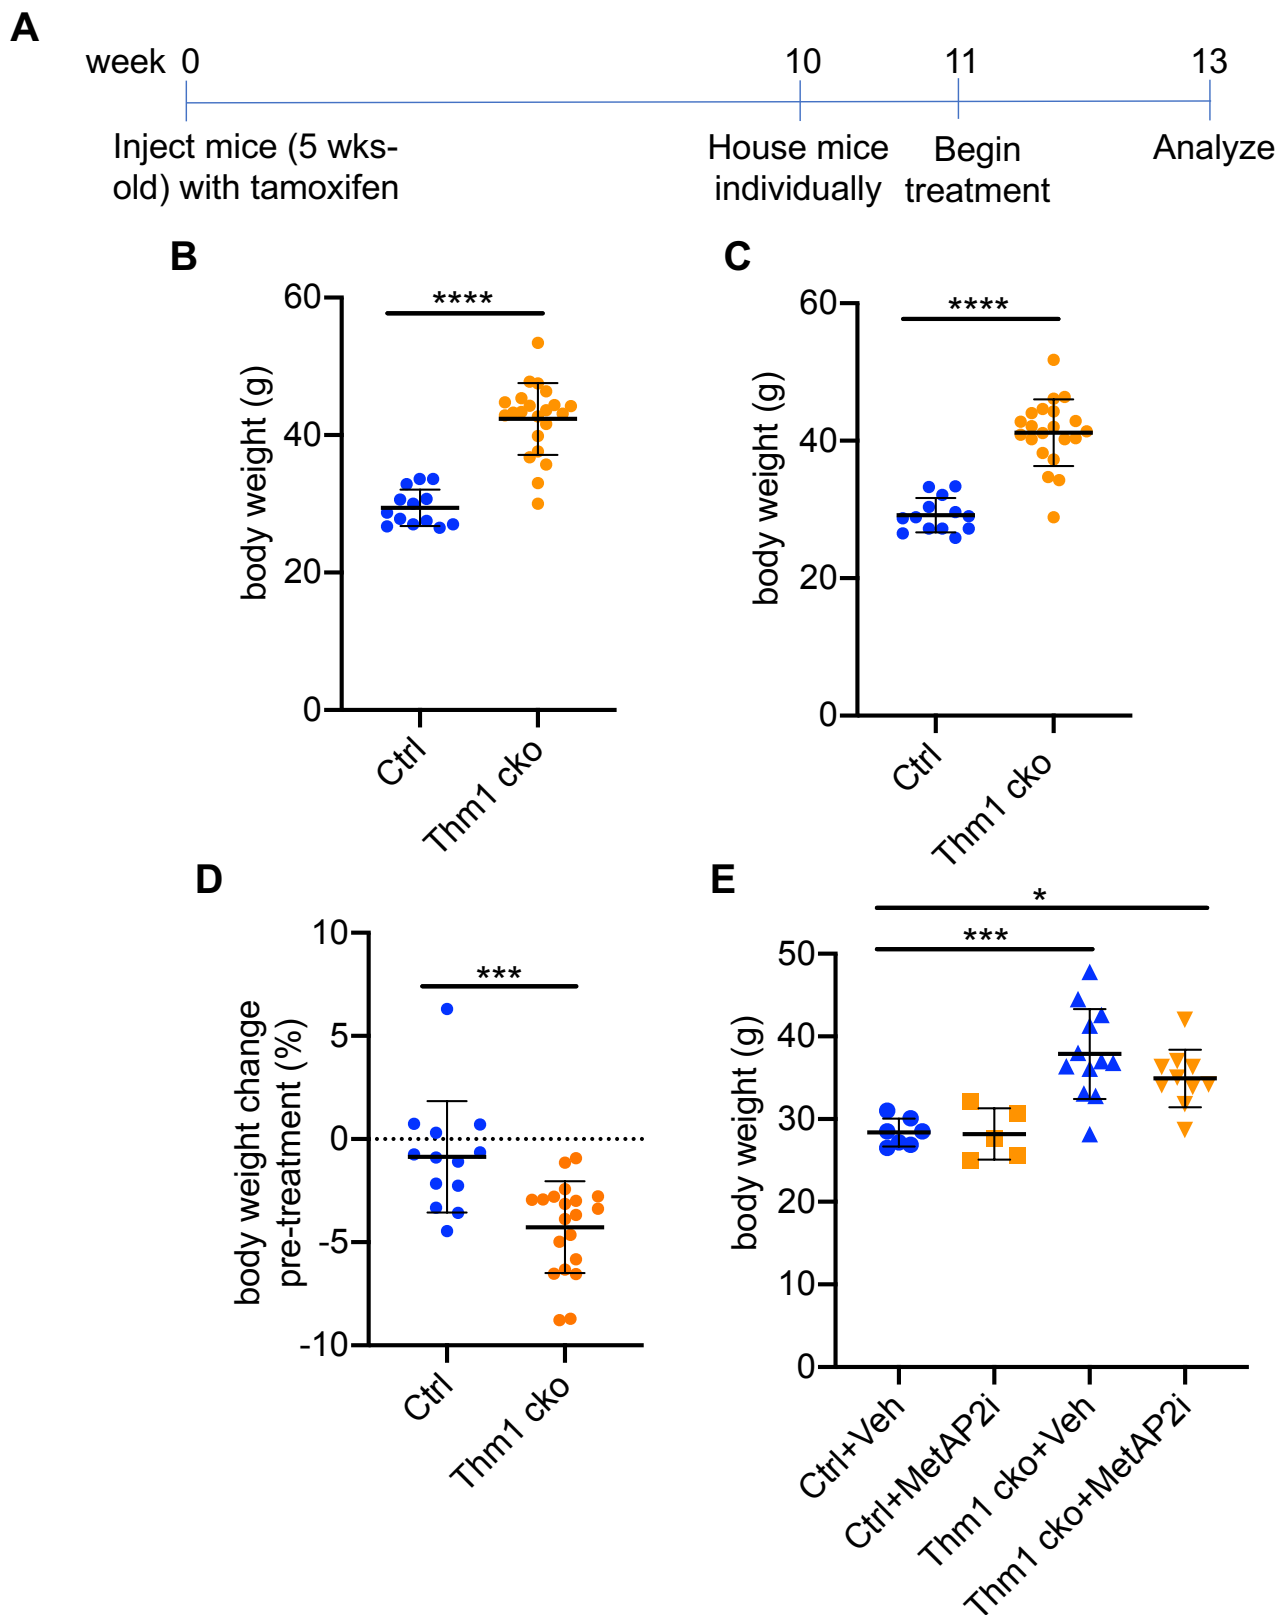

**Figure S1. Body weights pre- and post-treatment.** **A**) Experimental timeline. Mice were injected at 5 weeks of age (week 0 of experiment) with tamoxifen to induce deletion of *Thm1*. Mice were fed *ad libitum* from 0-10 weeks post-tamoxifen injection to obtain the obese phenotype in *Thm1* cko mice. At week 10 (10 weeks post-tamoxifen injection), mice were housed individually and food intake and body weight were measured daily. From week 11-13, subcutaneous injections of ZGN-1258 or vehicle were administered daily. **B**) Body weights at week 10; **C**) week 11 **D**) Percent body weight change during week 10. Statistical significance was determined by two-tailed t-test. **E**) Body weights at week 13. Bars represent mean  $\pm$  SD. Statistical significance was determined by one-way ANOVA followed by Tukey's test. Each data point represents an individual mouse. \* $P < 0.05$ ; \*\*\* $P < 0.0005$ ; \*\*\*\* $P < 0.00005$

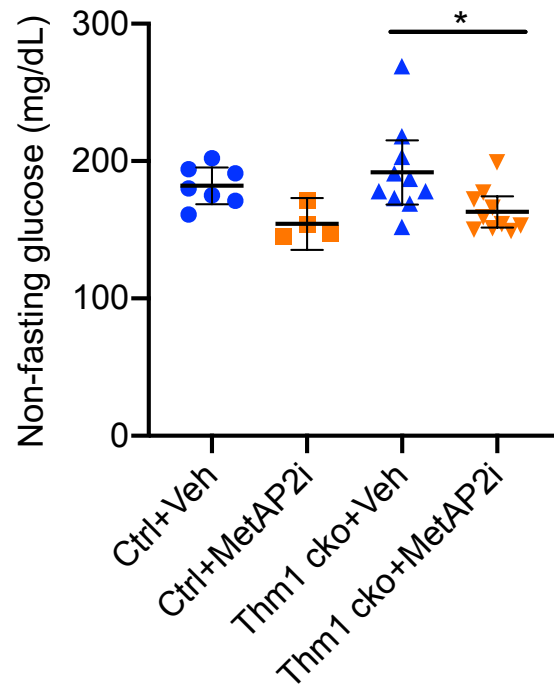

**Figure S2.** Non-fasting levels of serum glucose. Each data point represents an individual mouse. Bars represent mean  $\pm$  SD. Statistical significance was determined by one-way ANOVA followed by Tukey's test. \* $P < 0.05$

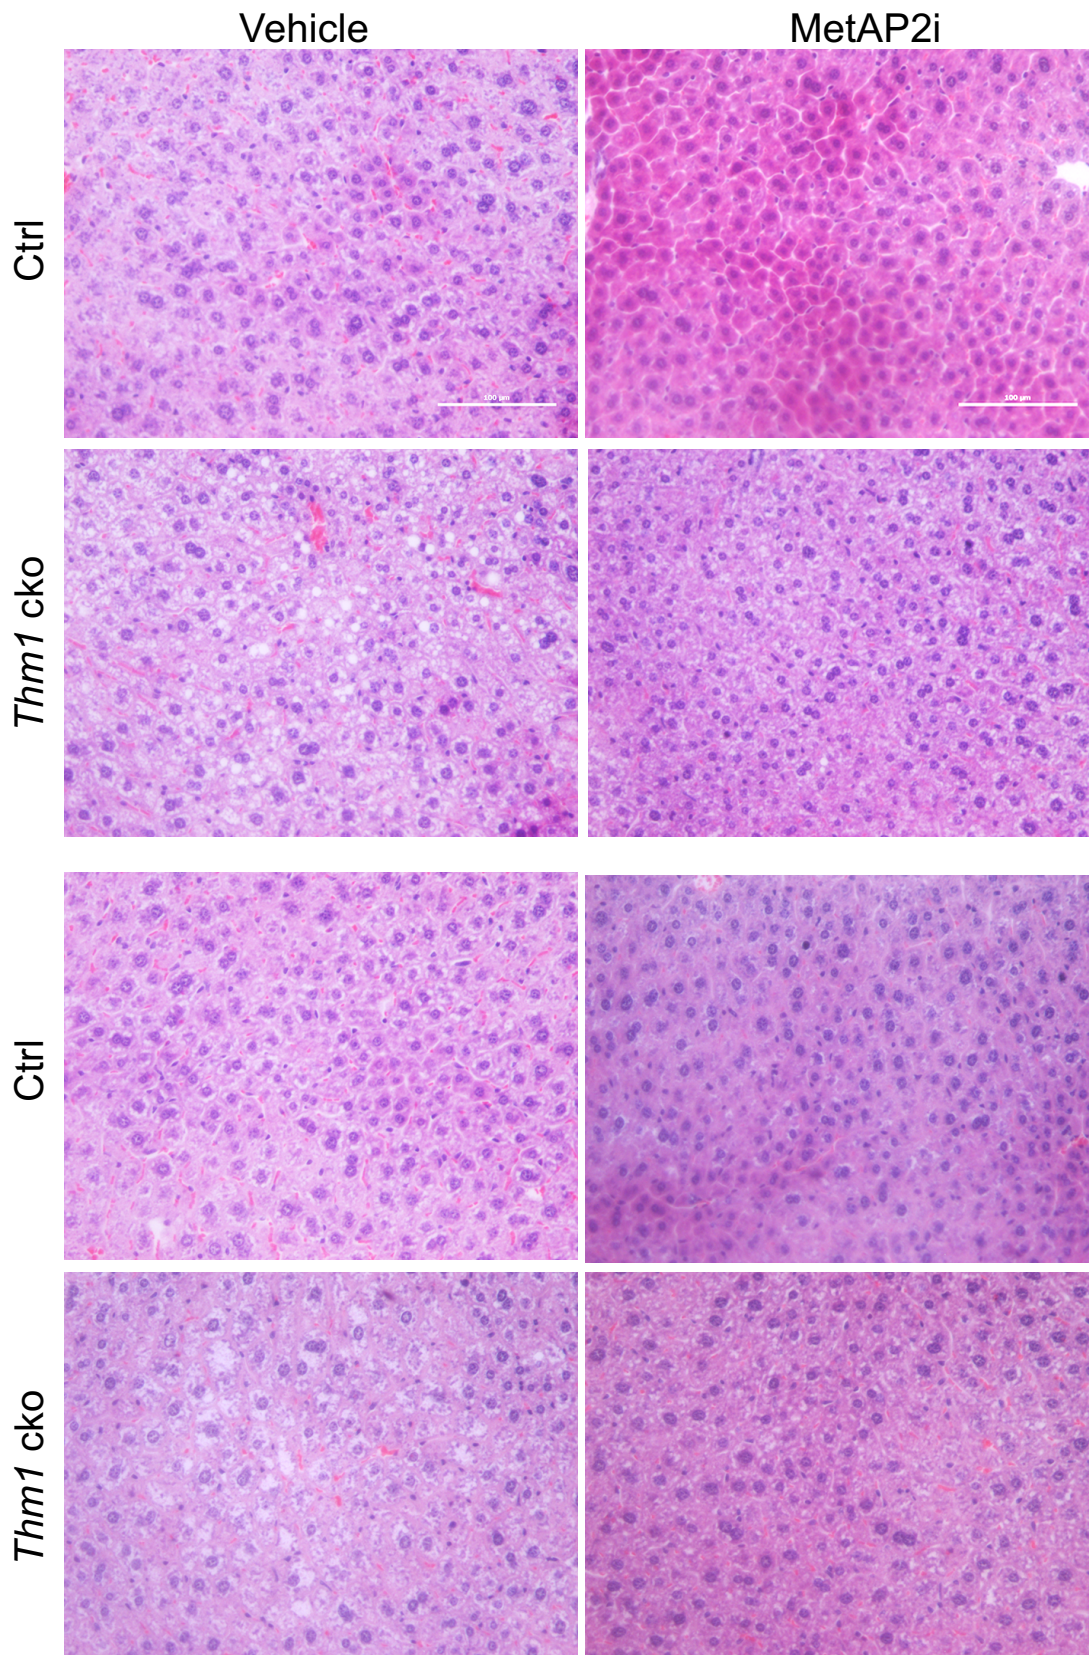

**Figure S3. Improved liver morphology in MetAP2i-treated *Thm1* cko mice.** Liver histology of vehicle and MetAP2i-treated control and *Thm1* cko littermates. N=2 litters. Scale bar - 100 $\mu$ m.

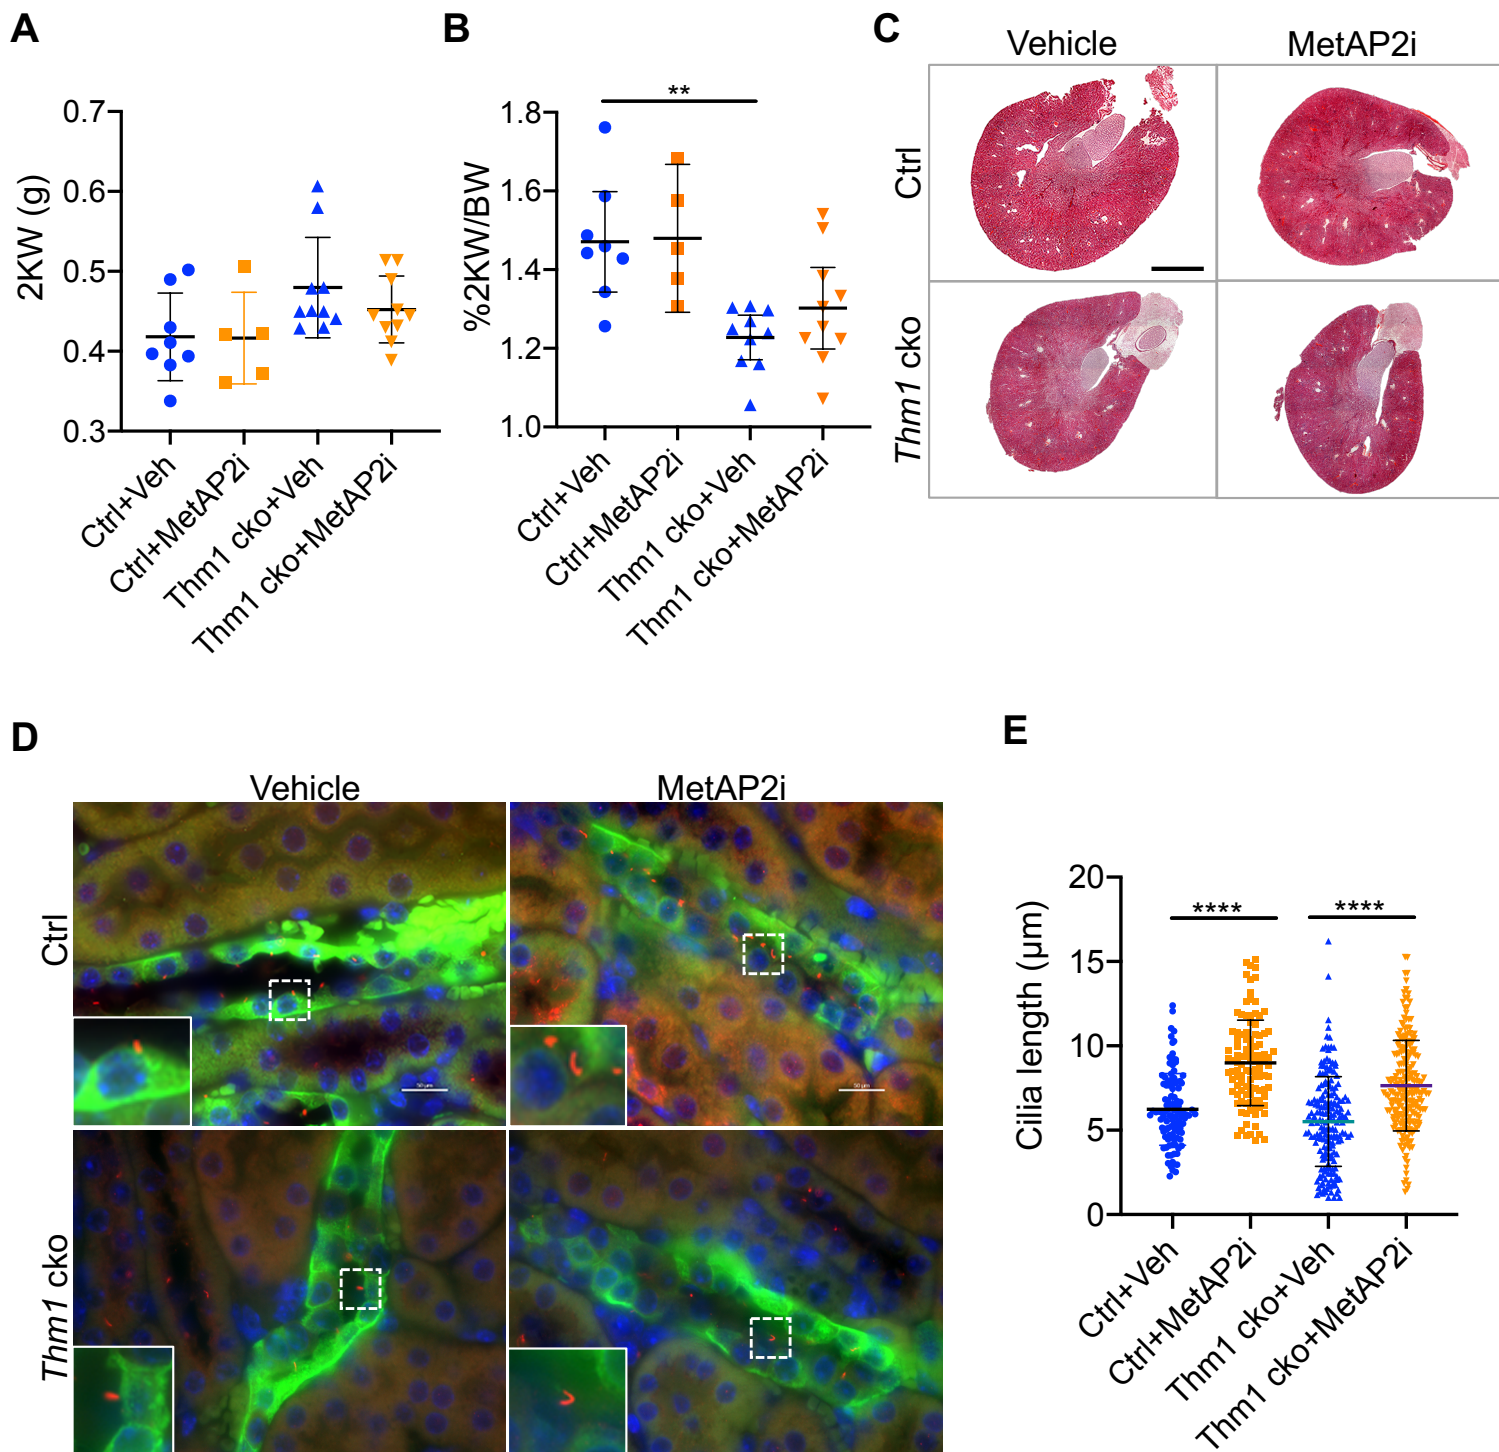

**Figure S4. MetAP2i treatment increased renal cilia length.** **A)** 2x kidney weight **B)** Percent 2x kidney weight/body weight. Each data point represents an individual mouse. **C)** Histology of kidneys of vehicle and MetAP2i treated control and *Thm1* cko mice. Scale bar- 1000μm **D)** Immunostaining of primary cilia membrane protein, ARL13B (red), together with staining with lectin DBA (green), which marks the collecting duct. Insets show higher magnification of dotted boxed regions. Scale bar – 50μm. **E)** Quantification of cilia length from N=3 mice/group. Each data point represents a cilium. Bars represent mean ± SD. Statistical significance was determined by one-way ANOVA followed by Tukey’s test. \*\*P<0.005; \*\*\*\*P<0.00005
